# Supplementary material for: Effects of Difluoro(oxalato)borate-Based Ionic Liquid as Electrolyte Additive for Li-Ion Batteries
Source: MDPI journal article supplement (doi:10.3390/ma16041411), 2023-02-08
Supplement: s1 [file s1]

## Effects of Difluoro(oxalato)borate-Based Ionic Liquid as Electrolyte Additive for Li-Ion Batteries

Graziano Di Donato, Giovanna Maresca, Matteo Palluzzi, Akiko Tsurumaki \* and Maria Assunta Navarra \*

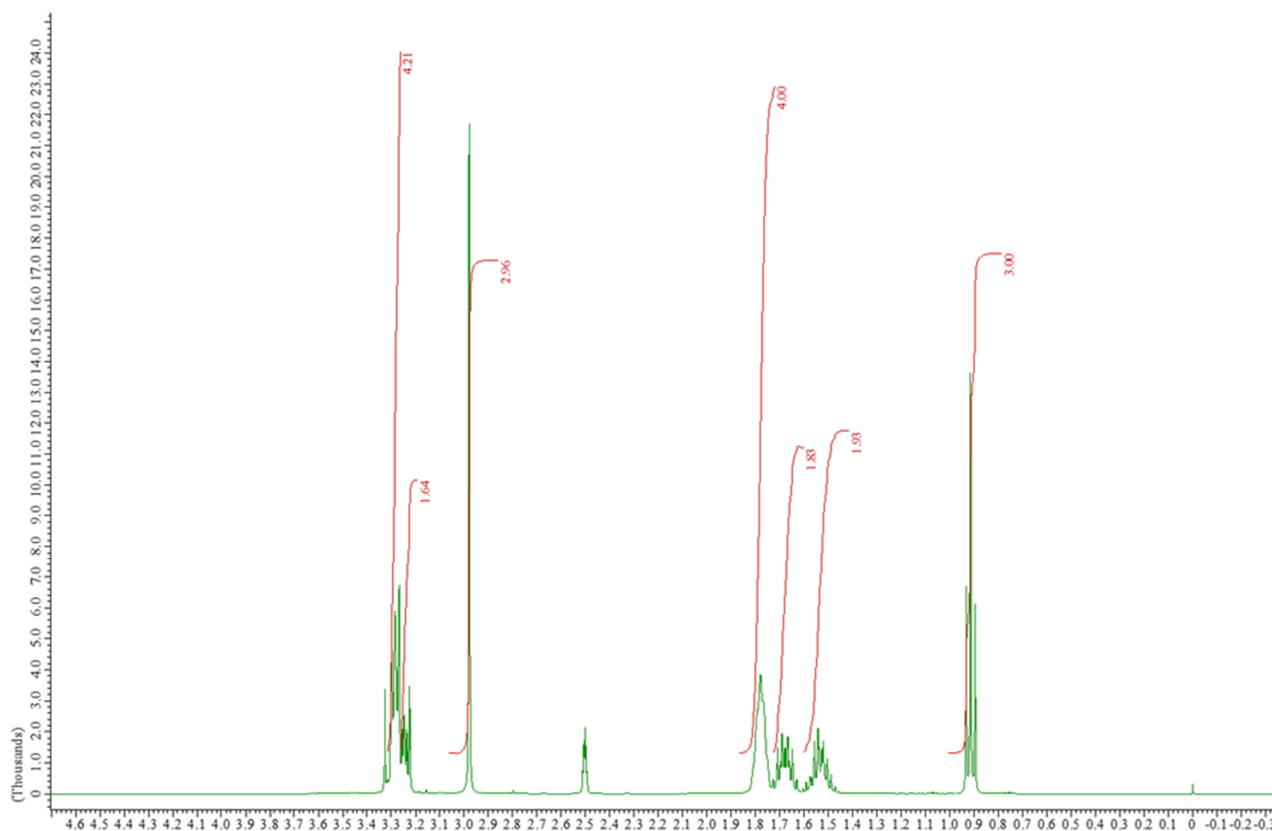

**Figure S1.**  $^1\text{H}$  NMR of the synthesized  $\text{Pip}_{13}\text{DFOB}$ .

**Table S1.** Bulk resistance ( $R_b$ ) and interfacial resistance ( $R_{int}$ ) values of KS6|KS6 symmetric cells. The spectra shown in Figure 6 (a,b) were fitted by using an equivalent circuit of  $R_b + Q_{int}/R_{int} + M$ , in which  $R$ ,  $Q$ , and  $M$  are resistance, constant phase element, and restricted linear diffusion element, respectively.

| Hour | LP30           |                    | LP30 + 0.1M Pip <sub>13</sub> DFOB |                    |
|------|----------------|--------------------|------------------------------------|--------------------|
|      | $R_b / \Omega$ | $R_{int} / \Omega$ | $R_b / \Omega$                     | $R_{int} / \Omega$ |
| 0    | 2.89           | 5.52               | 2.64                               | 1.65               |
| 24   | 2.66           | 5.90               | 2.79                               | 2.03               |
| 48   | 2.71           | 6.01               | 2.82                               | 2.08               |
| 72   | 2.86           | 6.13               | 2.90                               | 2.16               |
| 96   | 2.95           | 5.65               | 2.79                               | 2.11               |
| 120  | 2.95           | 5.80               | 2.89                               | 2.19               |
| 144  | 2.78           | 5.54               | 2.98                               | 2.29               |
| 168  | 2.82           | 5.54               | 3.04                               | 2.37               |

**Table S2.**  $R_b$  and  $R_{int}$  values of Li|Li symmetric cells. The spectra shown in Figure 6 (c,d) were fitted by using an equivalent circuit of  $R_b + Q_{int}/R_{int}$ .

| Hour | LP30           |                    | LP30 + 0.1M Pip <sub>13</sub> DFOB |                    |
|------|----------------|--------------------|------------------------------------|--------------------|
|      | $R_b / \Omega$ | $R_{int} / \Omega$ | $R_b / \Omega$                     | $R_{int} / \Omega$ |
| 0    | 5.04           | 89.97              | 6.28                               | 43.11              |
| 24   | 5.11           | 71.62              | 6.95                               | 64.42              |
| 48   | 5.14           | 74.87              | 7.22                               | 64.18              |
| 72   | 5.14           | 90.04              | 7.29                               | 78.73              |
| 96   | 5.03           | 101.40             | 7.18                               | 101.00             |
| 120  | 5.90           | 66.22              | 7.16                               | 68.33              |
| 144  | 5.00           | 63.11              | 6.92                               | 84.18              |
| 168  | 4.62           | 83.29              | 6.98                               | 78.34              |

**Table S3.**  $R_b$  values of LNMO|LNMO symmetric cells. The spectra shown in Figure 6 (e,f) were fitted by using an equivalent circuit of  $R_b + Q_{diff}/W_{diff}$ , in which  $W$  is Warburg element for diffusion.

| Hour | LP30           | LP30 + 0.1M Pip <sub>13</sub> DFOB |
|------|----------------|------------------------------------|
|      | $R_b / \Omega$ | $R_b / \Omega$                     |
| 0    | 17.03          | 4.07                               |
| 24   | 15.54          | 6.76                               |
| 48   | 15.15          | 7.48                               |
| 72   | 14.15          | 7.60                               |
| 96   | 13.34          | 7.36                               |
| 120  | 12.74          | 7.33                               |
| 144  | 12.39          | 7.37                               |
| 168  | 12.22          | 7.45                               |

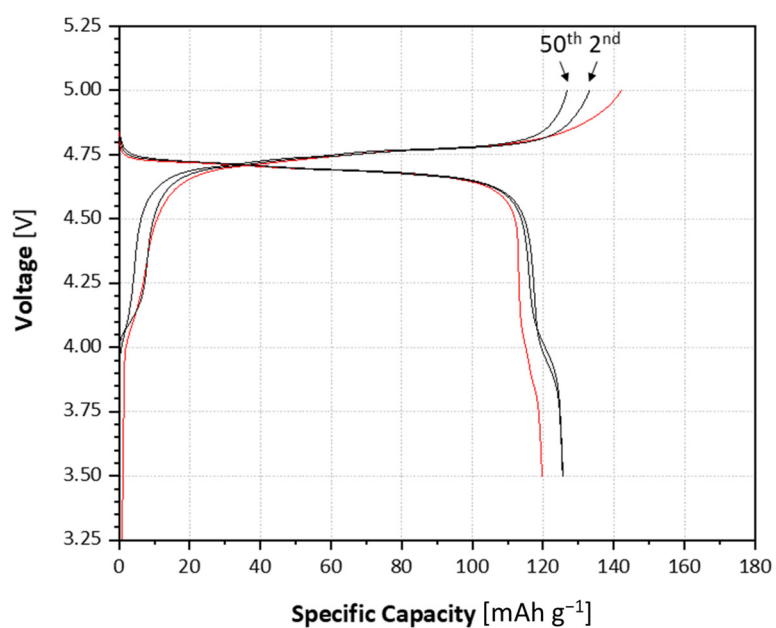

(a)

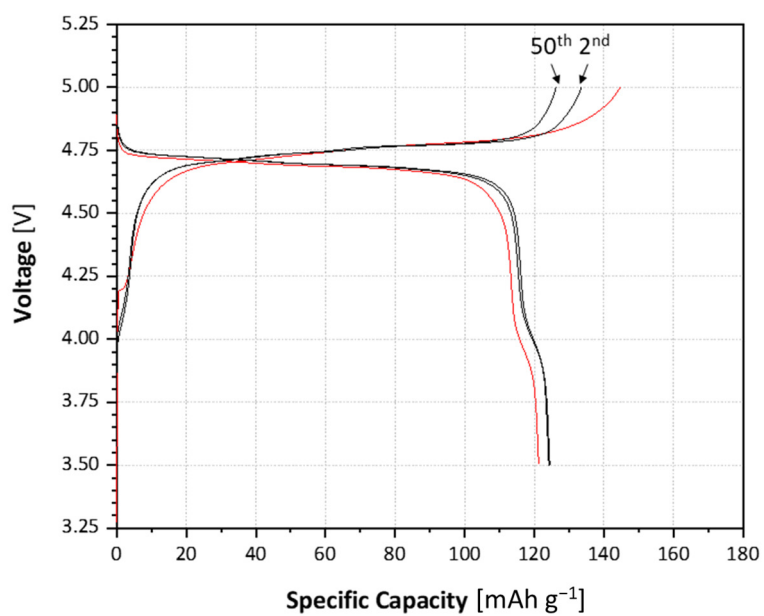

(b)

**Figure S2.** Voltage profiles of the 1st (red), 2nd and 50th (black) cycle of Li|LNMO cells without (a) and with (b) the addition of the IL.
